# Supplementary material for: Dual-color reversible fluorescent carbon dots designed for dynamic monitoring of cellular superoxide anion radicals
Source: Royal Society of Chemistry journal article supplement (doi:10.1039/d5tb00099h), 2025-01-01
Supplement: d5tb00099h1.pdf [file d5tb00099h1.pdf]

## Supplementary Material

### **Dual-color reversible fluorescent carbon dots designed for dynamic monitoring of Cellular superoxide anion radicals**

Dan Wang <sup>a, b</sup>, Yanke Zhai <sup>a, b</sup>, Yun Wang <sup>a, b</sup>, Xu Fu <sup>c, \*</sup>, Yibing Ji <sup>a, b, \*</sup>, Ruijun Li <sup>a, b, \*</sup>

<sup>a</sup> Department of Analytical Chemistry, China Pharmaceutical University, Nanjing 210009, China.

<sup>b</sup> Key Laboratory of Drug Quality Control and Pharmacovigilance, Ministry of Education, Nanjing 210009, China.

<sup>c</sup> Laboratory of Emergency Medicine, Lanzhou University Second Hospital, Gansu, Lanzhou, 730000, China.

\*Corresponding author: Xu Fu

E-mail address: [fuxu0910@163.com](mailto:fuxu0910@163.com)

\*Corresponding author: Yibing Ji

E-mail address: [jiyibing@msn.com](mailto:jiyibing@msn.com)

\*Corresponding author: Ruijun Li

E-mail address: [ccjlrj@cpu.edu.cn](mailto:ccjlrj@cpu.edu.cn)

Postal address: Department of Analytical Chemistry, China Pharmaceutical University, 24 TongJiaXiang, Nanjing, Jiangsu, China 210009

## **Table of Contents**

- 1. Materials and instruments**
- 2. CDs selectivity and disruptive concentration of various active species**
- 3. Cytotoxicity assay**
- 4. Figures**
- 5. References**

## Section 1. Materials and Apparatus

Caffeic acid (CA) was purchased from Yuanye (Shanghai, China), 4,4',4'',4'''-(Porphine-5,10,15,20-tetrayl) tetrakis (benzoic acid) (TCPP) was purchased from Macklin (Shanghai, China), Superoxide ( $O_2^{\bullet-}$ ) was delivered from  $KO_2$  in a DMSO solution.  $H_2O_2$  and  $ClO^-$  were obtained by direct dilution of aqueous solutions of  $NaClO$  and  $H_2O_2$ , respectively. The hydroxyl radical ( $\bullet OH$ ) was generated through the reaction of 1 mM  $Fe^{2+}$  with 200  $\mu M$   $H_2O_2$  <sup>1</sup>.

All fluorescence spectra were measured with a Horiba Jobin Yvon Fluoromax-4 spectrofluorometer (France). Fourier-transform infrared (FT-IR) spectra were carried out using an IR Affinity-1S spectrometer (Shimadzu, Japan). Fluorescent images were observed with a confocal laser scanning microscope (STELLARIS, Leica, Germany) and processed using the LAS X imaging software.

## Section 2. CDs selectivity and disruptive concentration of various active species

60  $\mu M$   $O_2^{\bullet-}$ , 100  $\mu M$   $Na^+$ , 100  $\mu M$   $K^+$ , 100  $\mu M$   $Zn^{2+}$ , 100  $\mu M$   $Ca^{2+}$ , 100  $\mu M$  ATP, 100  $\mu M$  AMP, 100  $\mu M$  Glu, 100  $\mu M$  Cys, 100  $\mu M$  GSH, 100  $\mu M$  AA, 100  $\mu M$  Glu,E, 100  $\mu M$  ASP, 100  $\mu M$  Trp, 100  $\mu M$  Ala, 100  $\mu M$   $Mg^{2+}$ , 50  $\mu M$   $Cu^{2+}$ , 50  $\mu M$   $Fe^{3+}$ , 50  $\mu M$   $H_2O_2$ , 50  $\mu M$   $\bullet OH$ , 20  $\mu M$   $ClO^-$ , 20  $\mu M$   $ONOO^-$ , 100  $\mu M$  TRY, 20  $\mu M$  NO.

## Section 3. Cytotoxicity assay

LO2 cells were seeded at a density of  $3 \times 10^5$  cells/well in 96-well plates and cultured in DMEM complete medium for 24 h at 37 °C in a sterile incubator with 5%  $CO_2$ . Afterward, 100  $\mu L$  of fresh medium containing different concentrations of CDs was added to each well, and the culture was continued for 24 h. Then, 20  $\mu L$  of a 3-(4,5-dimethylthiazol-2-yl)-2,5-diphenyltetrazolium bromide (MTT) (5 mg/mL) was added to each well and incubated for an additional 4 h. Afterward, the supernatant was removed, and 200  $\mu L$  of DMSO was added to each well. The relative cell viability was calculated by measuring the absorbance at 492 nm of the cells in each well using a microplate reader <sup>2</sup>.

## Section 4. Figures

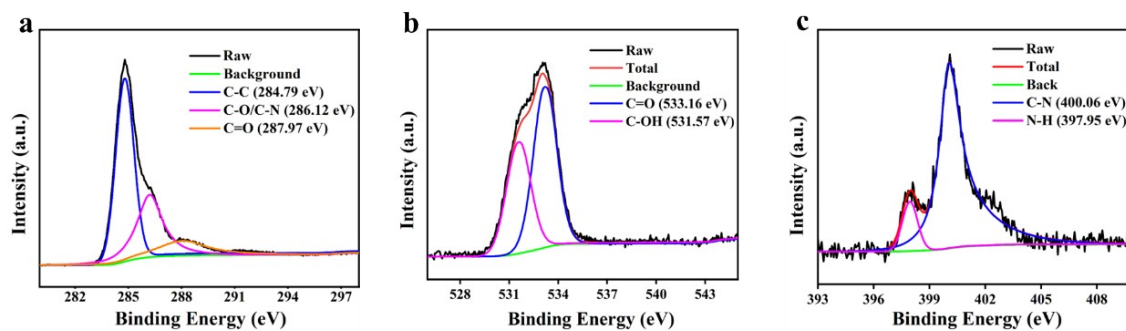

**Fig. S1** XPS analysis of (a) C 1s, (b) O 1s, (c) N 1s.

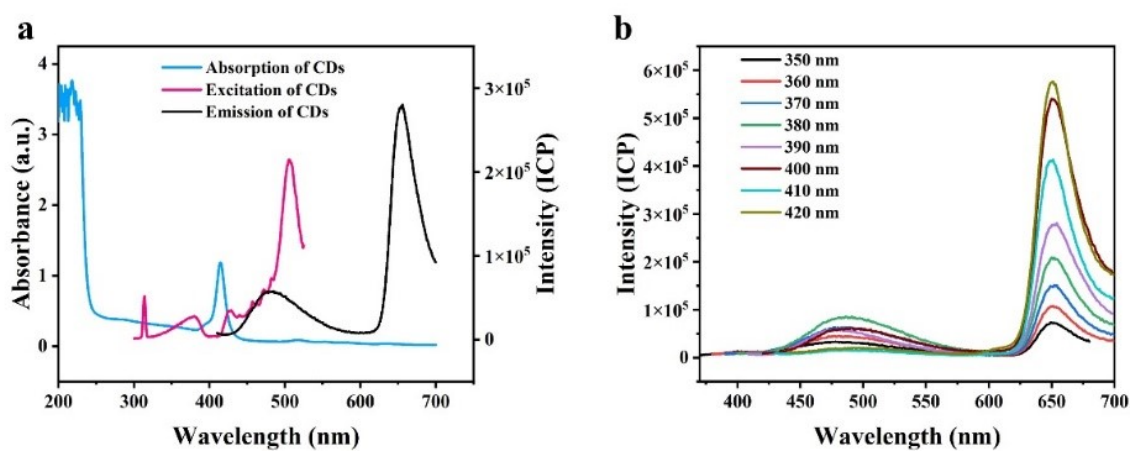

**Fig.S2** (a) UV/vis absorption spectrum of CDs, emission and excitation spectra of CDs. (b) the fluorescence spectra of CDs at different excitation wavelengths.

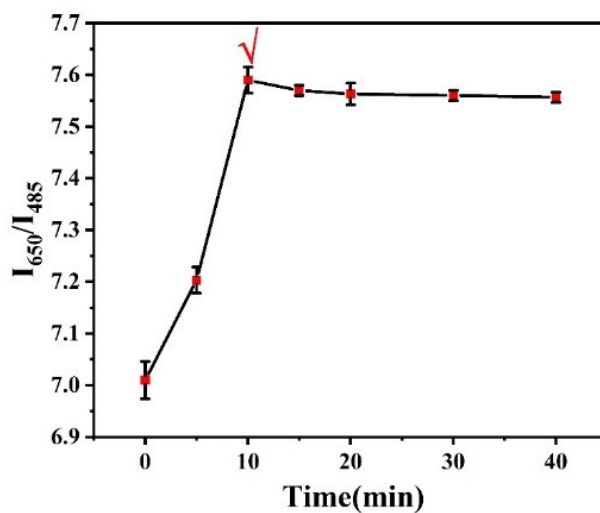

**Fig. S3** Incubation time on the sensing system.

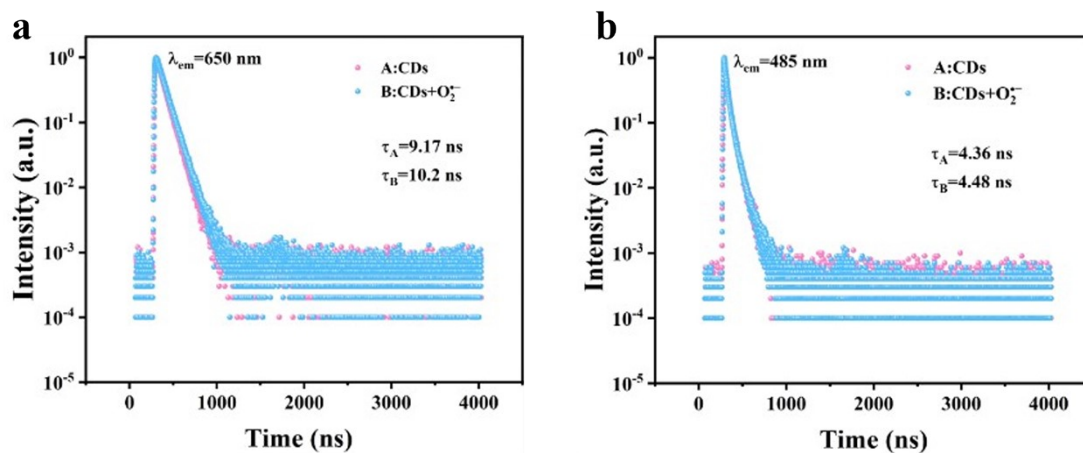

**Fig. S4** Fluorescence decay lifetime of CDs in the absence and presence of  $O_2^{\bullet-}$  (a)  $\lambda_{em} = 485$  nm and (b)  $\lambda_{em} = 650$  nm.

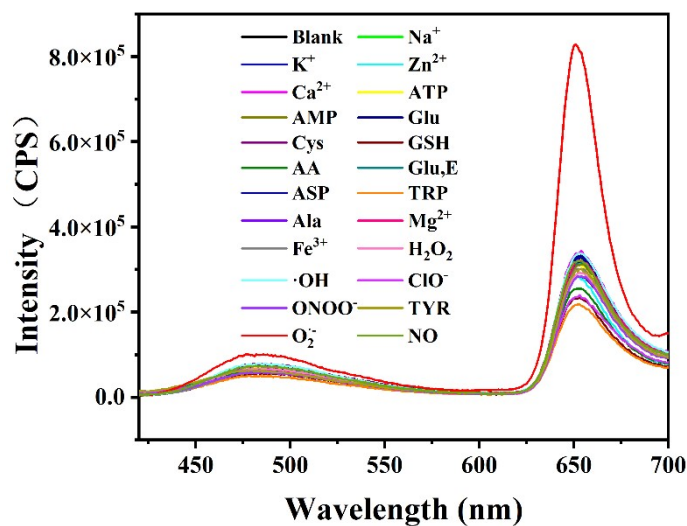

**Fig. S5** Fluorescence profiles of various interfering substances after reaction with CDs

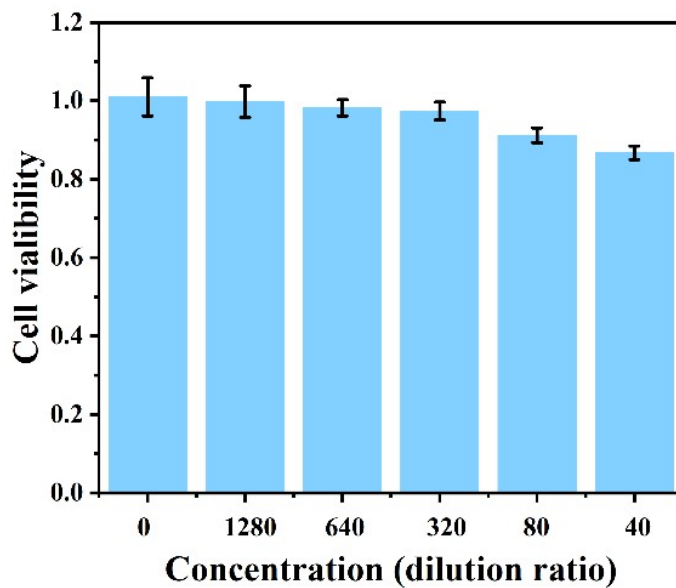

**Fig. S6** Cellular activity after co-incubation with CDs at different dilution levels

**Section 4 References**

1. Y. Zhou, P. Li, N. Fan, X. Wang, X. Liu, L. Wu, W. Zhang, W. Zhang, C. Ma and B. Tang, *Chemical Communications*, 2019, 55, 6767-6770.
2. Y. Zhou, E. O. Hileman, W. Plunkett, M. J. Keating and P. Huang, *Blood*, 2003, 101, 4098-4104.
